# Supplementary material for: Online faculty development in low- and middle-income countries for health professions educators: a rapid realist review
Source: Springer Nature journal article supplement (doi:10.1186/s12960-022-00711-6), 2022-01-29

|                 | Total hits  | Automatic duplicates removed | Hits after automatic deduplication | Duplicates within search | Unique hits | Duplicates across searches | Total duplicates |
|-----------------|-------------|------------------------------|------------------------------------|--------------------------|-------------|----------------------------|------------------|
| <b>Search 1</b> | 310         | 53                           | 257                                | 55                       | 202         | 75                         | 183              |
| <b>Search 2</b> | 138         | 34                           | 104                                | 22                       | 82          | 0                          | 56               |
| <b>Search 3</b> | 1388        | 500                          | 888                                | 43                       | 845         | 24                         | 567              |
|                 | <b>1836</b> | <b>587</b>                   | <b>1249</b>                        | <b>120</b>               | <b>1129</b> | <b>99</b>                  | <b>806</b>       |

| <b>Final Unique</b> | <b>Selected</b> | <b>Did not meet criteria</b> | <b>Full texts available</b> | <b>Full texts selected first review</b> | <b>Ancestor search</b> | <b>Duplicates in ancestor search</b> | <b>Ancestor search abstracts</b> | <b>Ancestor search selected</b> |
|---------------------|-----------------|------------------------------|-----------------------------|-----------------------------------------|------------------------|--------------------------------------|----------------------------------|---------------------------------|
| 127                 | 14              |                              |                             |                                         |                        |                                      |                                  |                                 |
| 82                  | 16              |                              |                             |                                         |                        |                                      |                                  |                                 |
| 821                 | 20              |                              |                             |                                         |                        |                                      |                                  |                                 |
| <b>1030</b>         | <b>50</b>       | <b>980</b>                   | <b>49</b>                   | <b>9</b>                                | <b>10</b>              | <b>2</b>                             | <b>8</b>                         | <b>0</b>                        |

Full texts  
selected  
for  
review

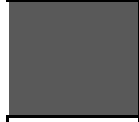

Supplement: MOESM1 [file 20079410]
